# Supplementary material for: Simplified synthesis of micropore-free mesoporous silica, SBA-15, under microwave-hydrothermal conditionsElectronic supplementary information (ESI) available: transmission electron microraphs of Pt-nanowires produced from micropore-free SBA-15 framework. See http://www.rsc.org/suppdata/cc/b2/b202152h/
Source: Royal Society of Chemistry journal article supplement (doi:10.1039/b202152h), 2002-07-15
Supplement: b202152h.doc [file b202152h.doc]

**Supporting information:**


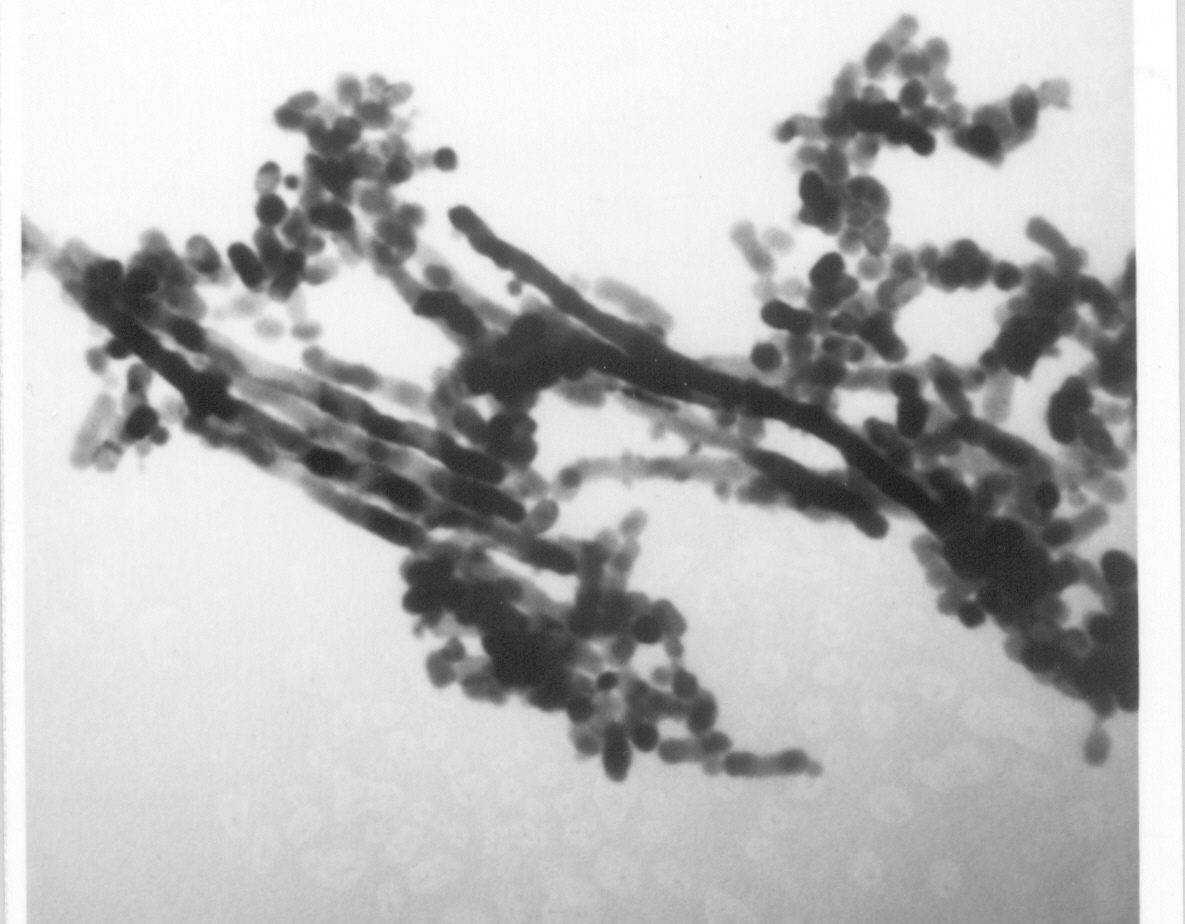


30 nm


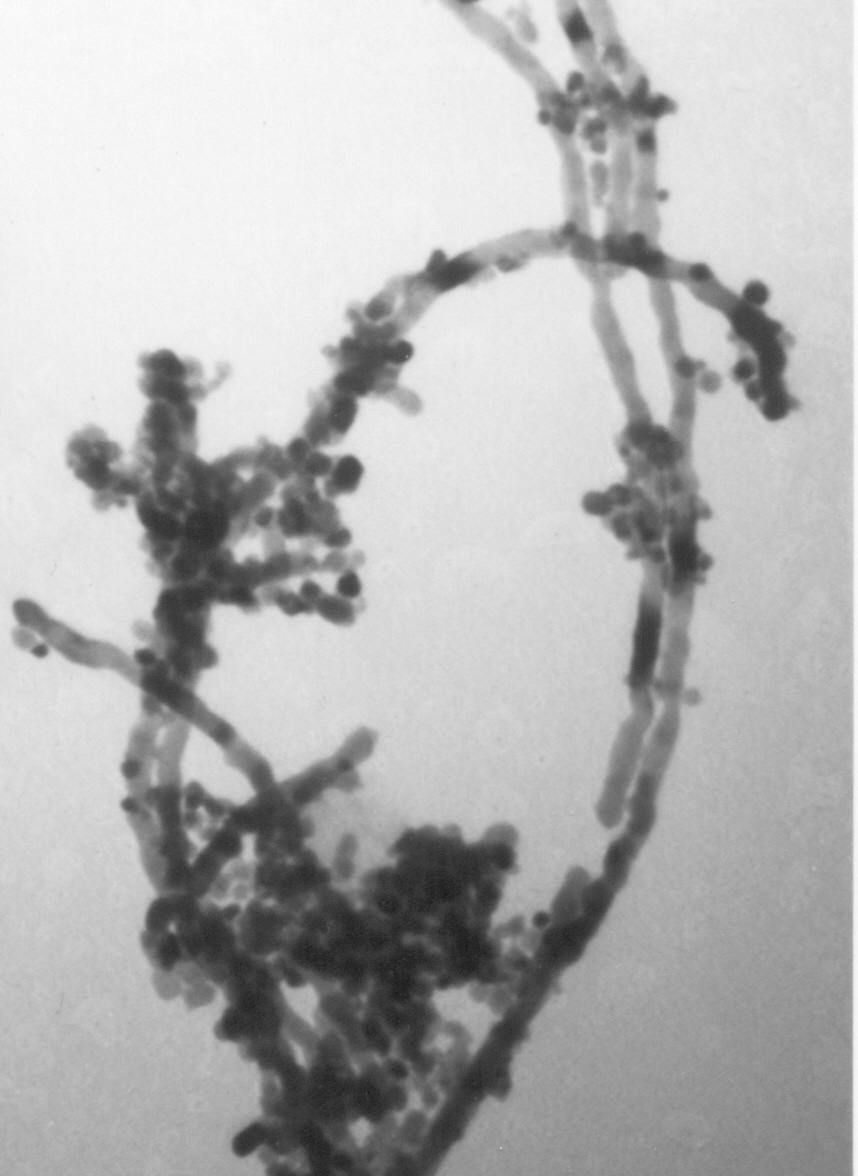


30 nm

Fig. 1 Transmission electron micrographs for Pt-nanowires produced from micropore free SBA-15 framework
